# Supplementary material for: The Interaction of Natural Selection and GC Skew May Drive the Fast Evolution of a Sand Rat Homeobox Gene
Source: PubMed Central journal article supplement (PMC6573468; doi:10.1093/molbev/msz080), 2019-04-09
Supplement: supplement_material_msz080.pdf [file supplement_material_msz080.pdf]

**Supplementary Material for:**

**The interaction of natural selection and GC skew may drive  
the fast evolution of a sand rat homeobox gene**

Yichen Dai and Peter W H Holland

**Content:**

Section 1: Coding sequences of mouse *Pdx1*, sand rat *Pdx1* and mousified sand rat *Pdx1*

Section 2: PAML analysis for positive selection in Pdx1 hexapeptide and homeodomain

Section 3: Statistical analysis for comparison of mouse and sand rat Pdx1 protein stability

Section 4: Statistical analysis for assessing effect of inhibiting UPS on mouse Pdx1 stability

Section 5: Statistical analysis for assessing effect of inhibiting UPS on sand rat Pdx1 stability

Section 6: Statistical analysis for assessing effect of lysine mutagenesis on mouse Pdx1 stability

Section 7: Statistical analysis for assessing effect of lysine mutagenesis on sand rat Pdx1 stability

## **Section 1: Coding sequences of mouse *Pdx1*, sand rat *Pdx1* and ‘mousified’ sand rat *Pdx1***

>Mouse *Pdx1*, original sequence (63.4% GC) used for experiments. NCBI Accession NM\_008814.3

```
ATGAACAGTGAGGAGCAGTACTACGCGGCCACACAGCTCTACAAGGACCCGTGCGCATTCAGAGGGG
CCCGGTGCCAGAGTTCAGCGCTAACCCCTGCGTGCCTGTACATGGGCCGCCAGCCCCACCTCCGC
CGCCACCCAGTTTACAAGCTCGCTGGGATCACTGGAGCAGGGAAGTCTCCGGACATCTCCCATA
GAAGTGCCCCCGCTCGCCTCCGACGACCCGGCTGGCGCTCACCTCCACCACCACCTTCAGCTCAGCT
CGGGCTCGCCCATCCACCTCCCGGACCTTTCCCGAATGGAACCGAGCCTGGGGGCTGGAAGAGCCCA
ACCGCGTCCAGCTCCCTTTCCCGTGGATGAAATCCACCAAAGCTCACGCGTGGAAAGGCCAGTGGGCA
GGAGGTGCTTACACAGCGGAACCCGAGGAAAAAAGAGGACCCGTAAGTGCCTACACCCGGGCGCAGCT
GCTGGAGCTGGAGAAGGAATTCTTATTTAAACAAATACATCTCCCGCCCCGCGGGTGGAGCTGGCAG
TGATGTTGAACTTGACCGAGAGACACATCAAAATCTGGTTCCAAAACCGTCGCATGAAGTGGAAAAA
GAGGAAGATAAGAAACGTAGTAGCGGGACCCGAGTGGGGCGGTGGGGCGAAGAGCCGGAGCAAGA
TTGTGCGGTGACCTCGGGCGAGGAGCTGCTGGCAGTGCACCGCTGCCACCTCCCGGAGGTGCCGTGC
CCCCAGGCGTCCAGCTGCAGTCCGGGAGGGCCTACTGCCTTCGGGCCTTAGCGTGTCCACAGCCC
TCCAGCATCGCGCCACTGCGACCGCAGGAACCCCGGTGA
```

>Sand rat *Pdx1*, original sequence (72.9% GC)

```
ATGGACAGAGAGGCCGAGCCCTTCTTCGAGGCCTCCTGGGCGTTCCCGGGGCCCGAGTTCGCGGCCCC
CGCTCCTCCTGCCTGTTTCGAGGGTGGGGGCGGGCAGCCTCCCCCCACGCTCCTCCCCACGCTCCTC
CCCACCTCGCCCCGTGCTCCCTGGACCCACCGGCCTCCAGCCGCCCCAGCCGGGGTCCCCCGCCG
CCACCCGGGGGCCCGACCAACCGCCCTTTGCTGGATGAAGAGCAGCAAAGGCCAAGCTGGAGCGG
CCAGTGGGCAGCCCCGGCCGAGGACTCGAACCTGTACACGCGGGCGCAGCGGCTGGAGCTGGAGA
AGGAATTCCTCTTCAGCCGCTACGTCGCGCGGCCGCGGGCGCTGGAGCTCGCGCGGGCGCTGAACCTC
ACCGAGAAGCACGTGAAGGTCTGGTTCCAGAACCGCCGCATGCGCTGGAAGAGGGAGGAGTCCGCGCG
GGGAGGACGGCGCCCCGGGAGGACGGAGGAGCGGGAGGCTCCCCGCCACCGTCTCCTCCTCCTCCT
CCTCCTCCTCCGTGGCCCCGGGATGCTCCTCCTCTTCTTCTCCCTCCTCCTCCTCCTACGGGGGA
CTGCGGTGA
```

>Sand rat *Pdx1*, ‘mousified’ sequence (63.0% GC) used for experiments in this study

```
ATGGACAGAGAAGCTGAACCTTCTTCGAAGCAAGTTGGGCATTCCCTGGTCCAGAGTTCGCGGCTCC
CGCTCCAGTTGCCTGTTTCGAGGGTGGAGGTGGACAGCCTCCACCTCACGCTCCTCCACACGCTCCTC
CACACCTCGCCCCATGCTCCCTGGACCCAAACCGGCCTCCAGCCACCTCAGCCAGGAGTCCCTCCGCCA
CCACCTGGAGGCCCTGACCAACCTCCTTTTGCCTGGATGAAAAGCAGCAAAGGCCAAGCTGGAGCGG
CCAGTGGGCAGCCCCGGCCGAGGACTCGAACCTGTACACTCGGGCGCAGCGGCTGGAGCTGGAGA
AGGAATTCCTTATTTAGCCGCTACGTCGCGCGGCCCTCGGGCGCTGGAGCTCGCACGGGCGTTGAACTTG
ACCGAGAAGCACGTGAAGGTCTGGTTCCAAAACCGTCGCATGCGCTGGAAGAGGGAGGAATCCGCGCG
GGGAAGGACGGCGCCTCGGGAAGACGGAGGAGCGGGAGGTTCTCCTCCACCTAGTAGTTCAAGCTCTA
GTTCCAGCTCCGTGGCCCCGGGATGCTCCTCCACTTCTTCTCCCTCCACCACCTCCGCCAACGGGTGGA
CTGCGATGA
```

## **Section 2: PAML analysis for positive selection in Pdx1 hexapeptide and homeodomain**

The alignment and phylogenetic tree in Fig. 1 (main paper) was used for analysis using codeml in PAML (version 4.9) (Yang 1997). First, we tested for positive selection on sites in the hexapeptide region and homeodomain by comparing a null model (M0, one  $\omega$  for all sites) to a nearly neutral model (M1a, two classes of sites  $0 < \omega < 1$  and  $\omega = 1$ ), and comparing M1a to positive selection (M2a, three classes of sites  $0 < \omega < 1$ ,  $\omega = 1$ ,  $\omega > 1$ ). We also compared the beta model (M7, multiple categories  $0 < \omega < 1$  and  $\omega = 1$ ) to beta with positive selection (M8, multiple categories  $0 < \omega < 1$ ,  $\omega = 1$ , plus  $\omega > 1$ ). Models M2a and M8 did not significantly outperform models M1a and M7. Second, we tested for presence of positive selection on the gerbil lineage. We compared the null model (M0) to a two-ratio branch model (gerbil lineage as foreground); the latter did not significantly outperform the null. Third, we used branch-site models to test for positive selection on the gerbil lineage at different sites within Pdx1. We compared a branch-site null model (A1, allowing  $0 < \omega < 1$ ,  $\omega = 1$ ) to a branch-site alternative model (A, allowing  $0 < \omega < 1$ ,  $\omega = 1$ , and  $\omega > 1$ ); the latter did not significantly outperform the null model. Significance was calculated using the Likelihood Ratio Test (LRT) (Jeffares et al. 2015).

| <b>Model</b>                     | <b>Parameters specified</b>                        | <b>lnL</b>   | <b>ntime</b> | <b>np</b> |
|----------------------------------|----------------------------------------------------|--------------|--------------|-----------|
| <b><u>Site models</u></b>        |                                                    |              |              |           |
| M0 (one-ratio)                   | NSsites = 0, model = 0                             | -1034.558186 | 23           | 25        |
| M1a (nearly neutral)             | NSsites = 1, model = 0                             | -1034.558846 | 23           | 26        |
| M2a (positive selection)         | NSsites = 2, model = 0                             | -1037.646198 | 23           | 28        |
| M7 (beta)                        | NSsites = 7, model = 0                             | -1025.473872 | 23           | 26        |
| M8 (beta and $\omega$ )          | NSsites = 8, model = 0                             | -1025.474532 | 23           | 28        |
| <b><u>Branch models</u></b>      |                                                    |              |              |           |
| Two-ratio model                  | NSsites = 0, model = 2                             | -1034.061948 | 23           | 26        |
| <b><u>Branch-site models</u></b> |                                                    |              |              |           |
| Model A1 (null model)            | NSsites = 2, model = 2,<br>fixomega = 1, omega = 1 | -1031.077597 | 23           | 27        |
| Model A (alternative model)      | NSsites = 2, model = 2,<br>fixomega = 0,           | -1031.077597 | 23           | 28        |

**Supplementary Table 1.** Parameters reported for PAML analysis (version 4.9) (Yang 1997) generated using sequence alignments of Pdx1 hexapeptide region and homeodomain from the 13 vertebrate species shown in Figure 1. The tree used for analysis is shown in Figure 1. The analysis showed that models allowing positive selection did not significantly outperform models not allowing positive selection.

### Section 3: Statistical analysis for comparison of mouse and sand rat Pdx1 protein stability

| Fixed effects               | df  | <i>t</i> Value | <i>p</i> Value |
|-----------------------------|-----|----------------|----------------|
| Intercept                   | 625 | 38.32785       | 0              |
| Type: Sand rat              | 87  | 12.22414       | 0              |
| Sqrt(Time)                  | 625 | -23.24835      | 0              |
| Type: Sand rat × Sqrt(Time) | 625 | -5.24269       | 0              |

**Supplementary Table 2.** Parameters reported for the linear mixed effects model generated using data shown in Fig. 2c. Table shows degrees of freedom, *t* value, and *p* value of fixed effects sqrt(Time), type of species, and their interaction. Half-life calculations were obtained using this model.

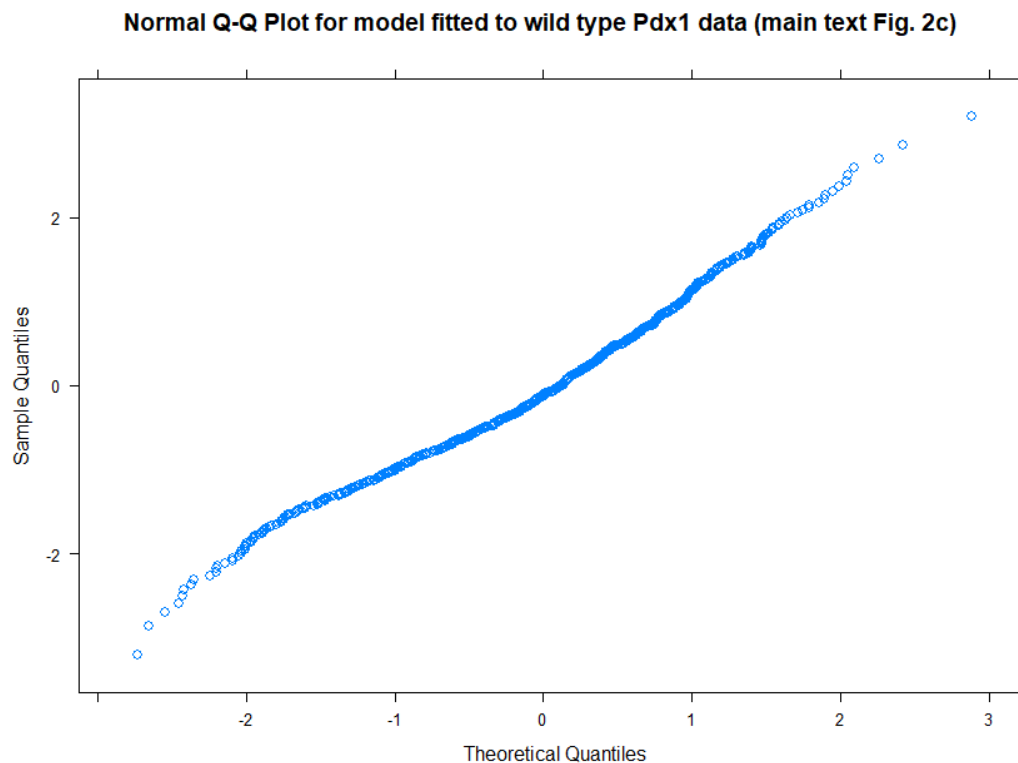

**Supplementary Figure 1.** To analyse the normality of the square-root transformed data, Quantile-Quantile Plots were generated using the generic qqnorm function in R (R Core Team 2018). X-axis values represent a theoretical group of values following a normal distribution, and Y-axis values represent the values used to construct the linear mixed effects model.

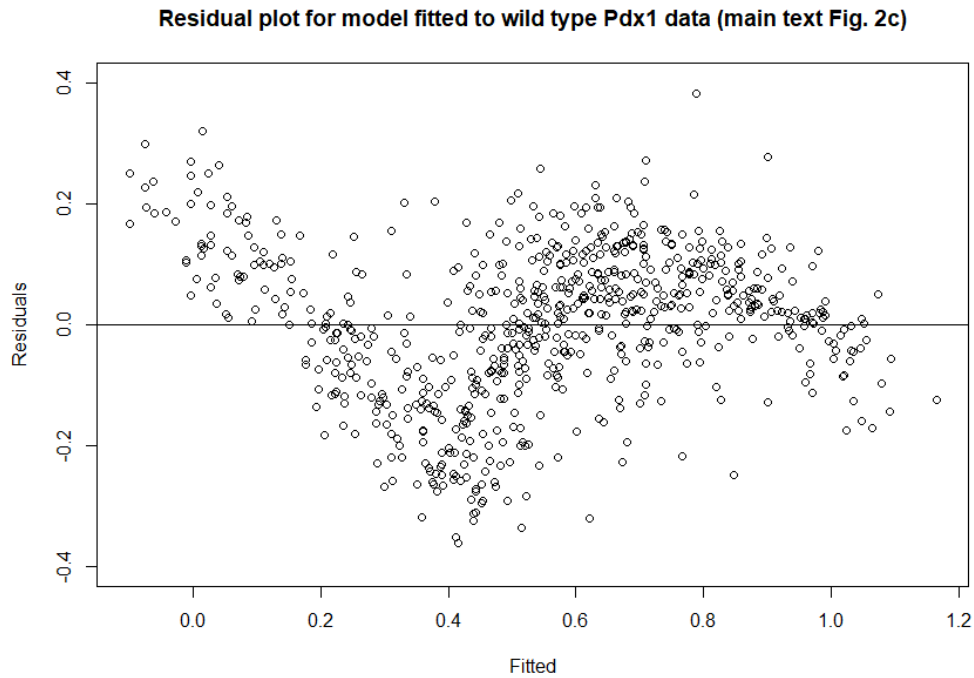

**Supplementary Figure 2** To analyse the homoscedasticity of the square-root transformed data, residual plots were generated using the generic plot function in R (R Core Team 2018). The fitted values generated from each linear mixed effects model were plotted back against the difference between each fitted value and original input value.

**Section 4: Statistical analysis for assessing effect of inhibiting UPS on mouse Pdx1 stability**

| <b>Fixed effects</b>                | <b>df</b> | <b><i>t</i> Value</b> | <b><i>p</i> Value</b> |
|-------------------------------------|-----------|-----------------------|-----------------------|
| <b>Intercept</b>                    | 350       | 38.85098              | 0e+00                 |
| <b>Type: Treatment</b>              | 44        | 3.67540               | 6e-04                 |
| <b>Sqrt(Time)</b>                   | 350       | -22.66775             | 0e+00                 |
| <b>Type: Treatment × Sqrt(Time)</b> | 350       | 3.96114               | 1e-04                 |

**Supplementary Table 3.** Parameters reported for the linear mixed effects model generated using data shown in Fig. 3a. Table shows degrees of freedom, *t* value, and *p* value of fixed effects sqrt(Time), type of treatment, and their interaction. Half-life calculations were obtained using this model.

**Normal Q-Q Plot for model fitted to MG132 treatment, mouse Pdx1 data (main text Fig. 3a)**

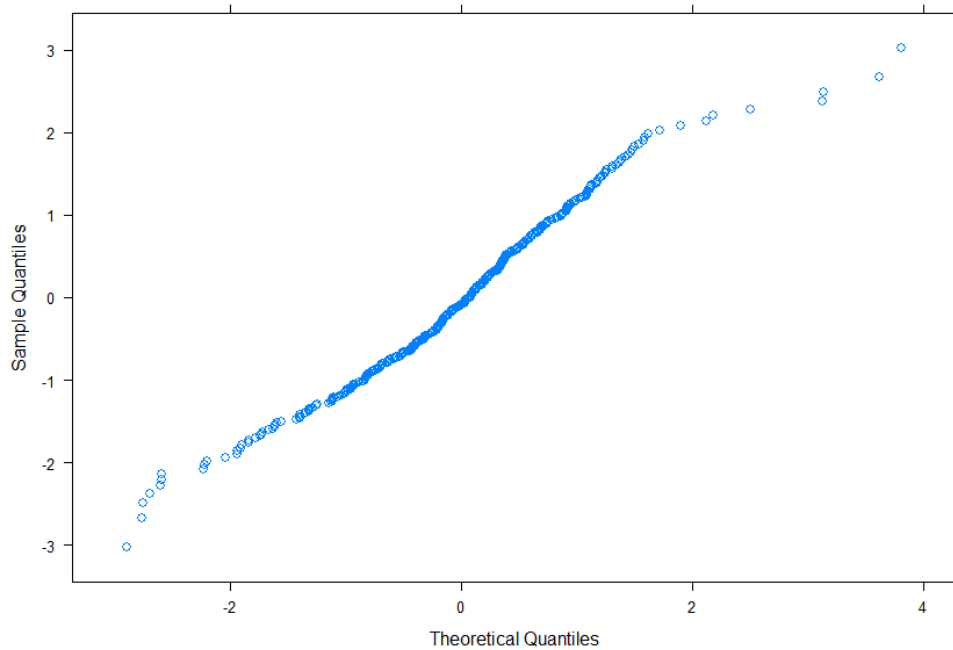

**Supplementary Figure 3.** To analyse the normality of the square-root transformed data, Quantile-Quantile Plots were generated using the generic qqnorm function in R (R Core Team 2018). Axes as in Supplementary Figure 1.

**Residual plot for model fitted to MG132 treatment, mouse Pdx1 data (main text Fig. 3a)**

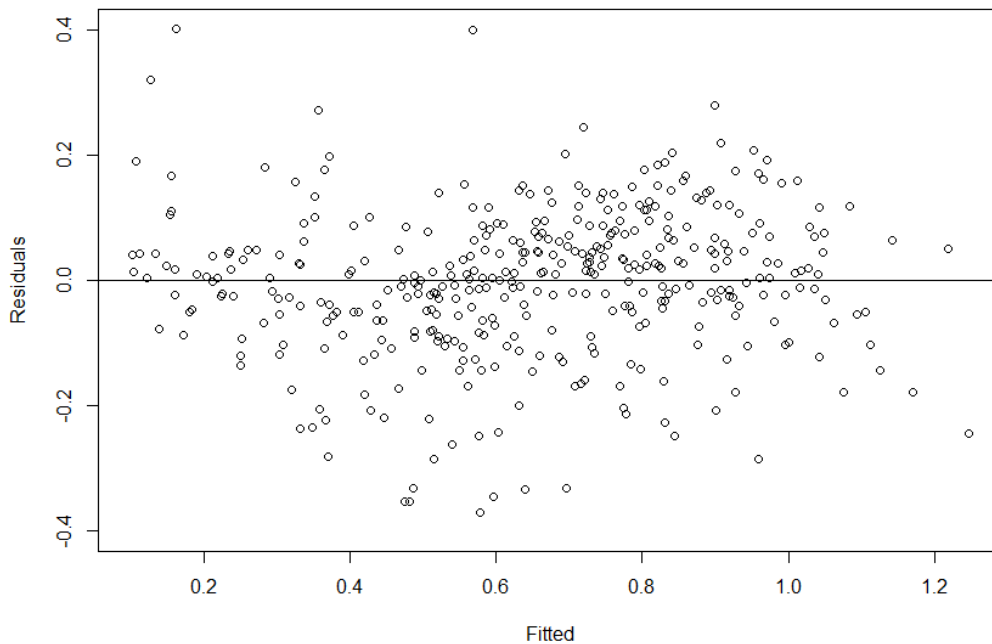

**Supplementary Figure 4.** To analyse the homoscedasticity of the square-root transformed data, residual plots were generated using the generic plot function in R (R Core Team 2018).

**Section 5: Statistical analysis for assessing effect of inhibiting UPS on sand rat Pdx1 stability**

| Fixed effects                | df  | <i>t</i> Value | <i>p</i> Value |
|------------------------------|-----|----------------|----------------|
| Intercept                    | 325 | 36.56956       | 0.0000         |
| Type: Treatment              | 33  | -0.98462       | 0.3320         |
| Sqrt(Time)                   | 325 | -16.39190      | 0.0000         |
| Type: Treatment × Sqrt(Time) | 325 | 3.40934        | 0.0007         |

**Supplementary Table 4.** Parameters reported for the linear mixed effects model generated using data shown in Fig. 3b. Table shows degrees of freedom, *t* value, and *p* value of fixed effects sqrt(Time), type of treatment, and their interaction. Half-life calculations were obtained using this model.

**Normal Q-Q Plot for model fitted to MG132 treatment, sand rat Pdx1 data (main text Fig. 3b)**

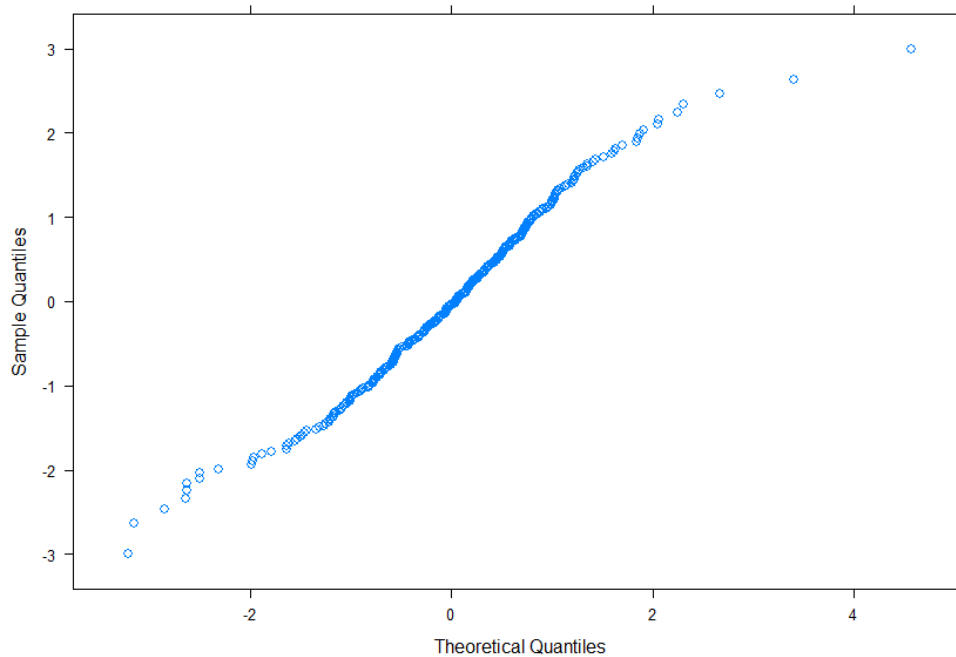

**Supplementary Figure 5.** To analyse the normality of the square-root transformed data, Quantile-Quantile Plots were generated using the generic qqnorm function in R (R Core Team 2018). Axes as in Supplementary Figure 1.

**Residual plot for model fitted to MG132 treatment, sand rat Pdx1 data (main text Fig. 3b)**

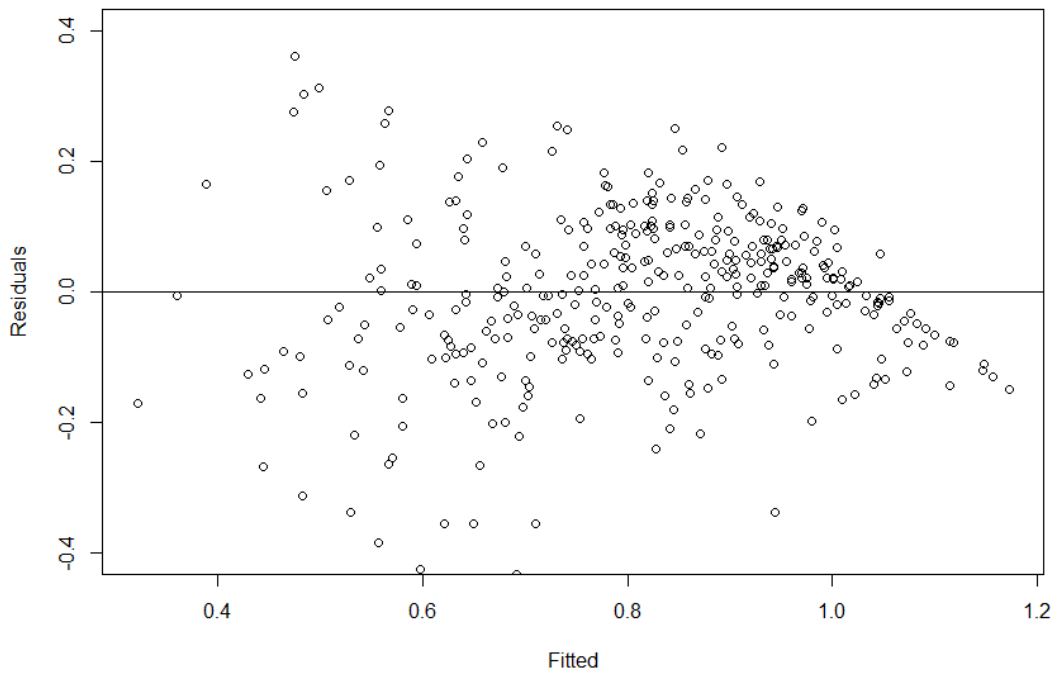

**Supplementary Figure 6.** To analyse the homoscedasticity of the square-root transformed data, residual plots were generated using the generic plot function in R (R Core Team 2018).

**Section 6: Statistical analysis for assessing effect of lysine mutagenesis on mouse Pdx1 stability**

| <b>Fixed effects</b>            | <b>df</b> | <b>t Value</b> | <b>p value</b> |
|---------------------------------|-----------|----------------|----------------|
| <b>Intercept</b>                | 480       | 18.953975      | 0.0000         |
| <b>Type: K170R</b>              | 89        | -0.153405      | 0.8784         |
| <b>Type: K204R</b>              | 89        | -0.444863      | 0.6575         |
| <b>Type: K208R</b>              | 89        | 1.037924       | 0.3021         |
| <b>Type: K209R</b>              | 89        | 0.336021       | 0.7376         |
| <b>Sqrt(Time)</b>               | 480       | -9.084160      | 0.0000         |
| <b>Type: K170R × Sqrt(Time)</b> | 480       | 2.223133       | 0.0267         |
| <b>Type: K204R × Sqrt(Time)</b> | 480       | -1.446534      | 0.1487         |
| <b>Type: K208R × Sqrt(Time)</b> | 480       | -1.500572      | 0.1341         |
| <b>Type: K209R × Sqrt(Time)</b> | 480       | -0.546916      | 0.5847         |



**Supplementary Table 5.** Parameters reported for the linear mixed effects model generated using data shown in Fig. 4a. Table shows degrees of freedom,  $t$  value, and  $p$  value of fixed effects  $\sqrt{\text{Time}}$ , type of treatment, and their interaction. Half-life calculations were obtained using this model.

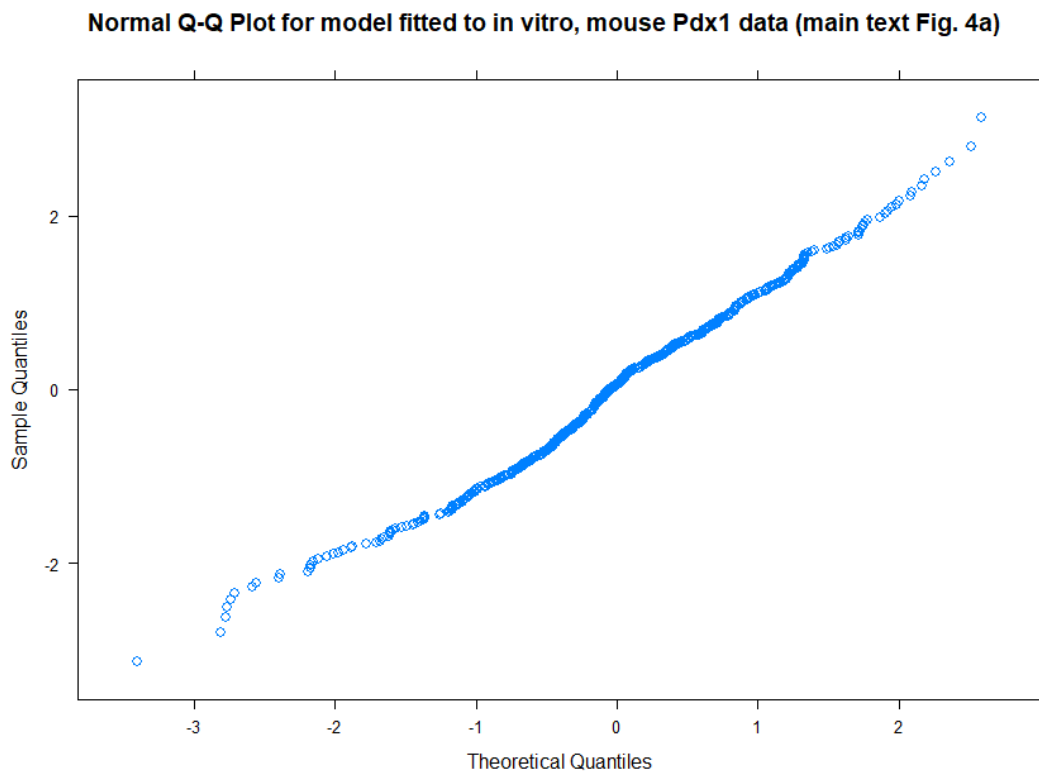

**Supplementary Figure 7.** To analyse the normality of the square-root transformed data, Quantile-Quantile Plots were generated using the generic `qqnorm` function in R (R Core Team 2018). Axes as in Supplementary Figure 1.

**Residual plot for model fitted to in vitro, mouse Pdx1 data (main text Fig. 4a)**

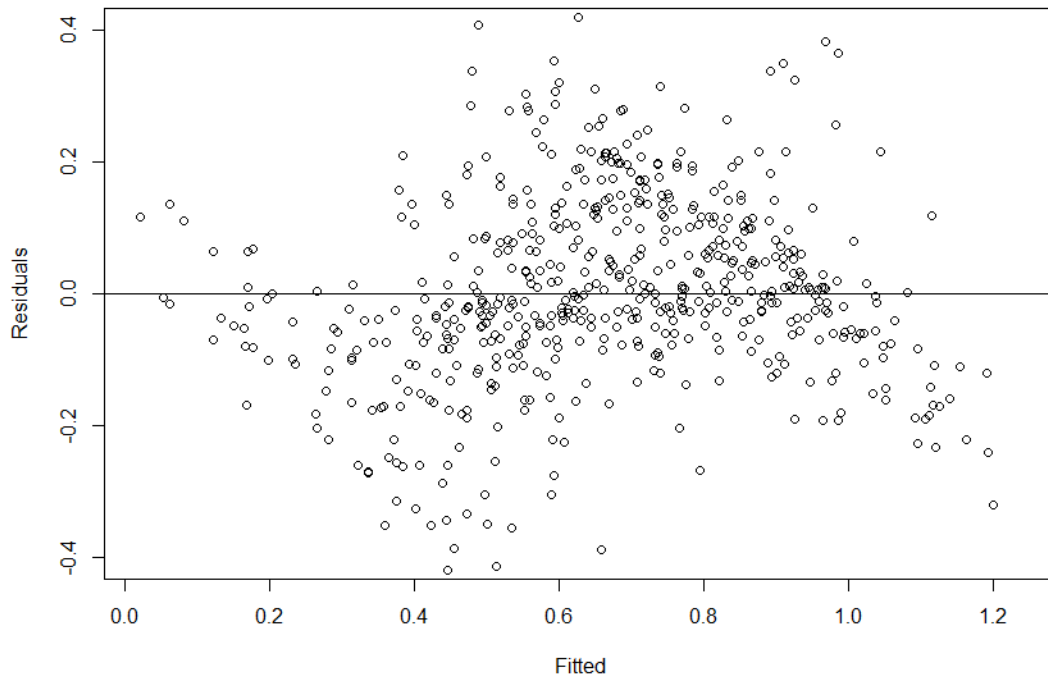

**Supplementary Figure 8.** To analyse the homoscedasticity of the square-root transformed data, residual plots were generated using the generic plot function in R (R Core Team 2018).

**Section 7: Statistical analysis for assessing effect of lysine mutagenesis on sand rat Pdx1 stability**

| Source of variation             | df  | <i>t</i> Value | <i>p</i> value |
|---------------------------------|-----|----------------|----------------|
| <b>Intercept</b>                | 626 | 45.08517       | 0.0000         |
| <b>Type: K124R</b>              | 84  | -1.01502       | 0.3130         |
| <b>Type: K127R</b>              | 84  | -0.67135       | 0.5038         |
| <b>Type: K189R</b>              | 84  | -3.28740       | 0.0015         |
| <b>Sqrt(Time)</b>               | 626 | -21.83059      | 0.0000         |
| <b>Type: K124R × Sqrt(Time)</b> | 626 | 0.04408        | 0.9649         |
| <b>Type: K127R × Sqrt(Time)</b> | 626 | 0.59238        | 0.5538         |
| <b>Type: K189R × Sqrt(Time)</b> | 626 | 11.01595       | 0.0000         |

**Supplementary Table 6.** Parameters reported for the linear mixed effects model generated using data shown in Fig. 4b. Table shows degrees of freedom,  $t$  value, and  $p$  value of fixed effects sqrt(Time), type of treatment, and their interaction. Half-life calculations were obtained using this model.

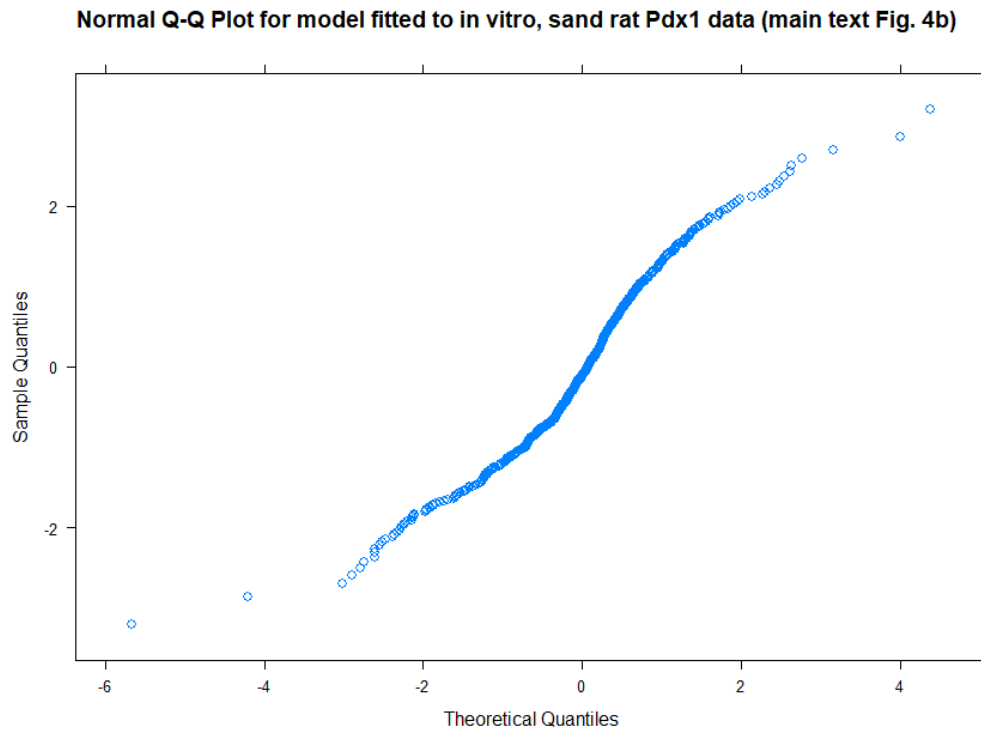

**Supplementary Figure 9.** To analyse the normality of the square-root transformed data, Quantile-Quantile Plots were generated using the generic qqnorm function in R (R Core Team 2018). Axes as in Supplementary Figure 1.

**Residual plot for model fitted to in vitro, sand rat Pdx1 data (main text Fig. 4b)**

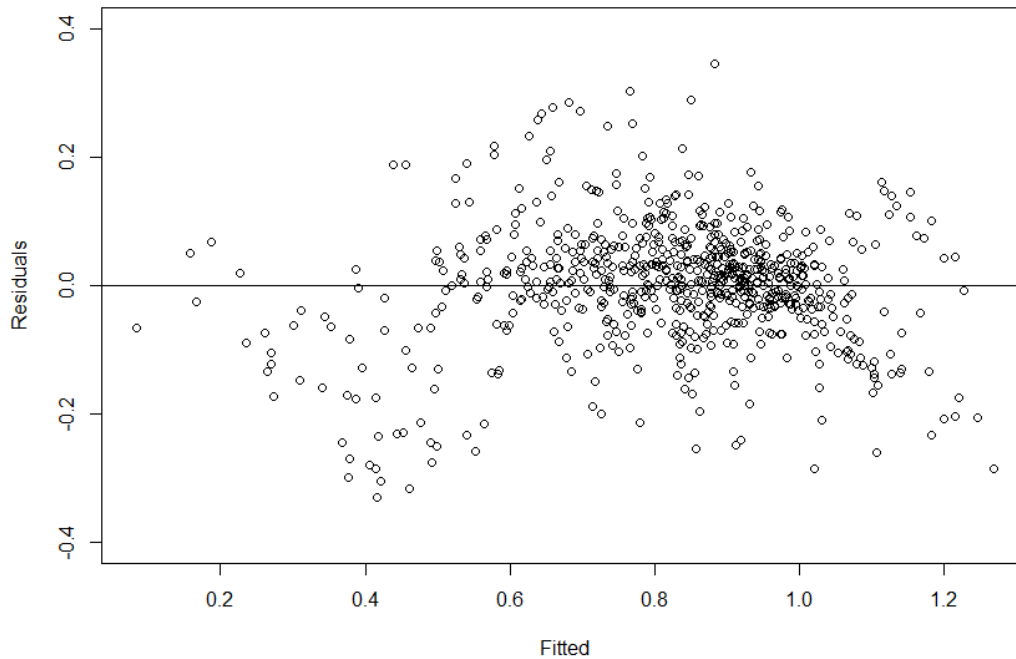

**Supplementary Figure 10.** To analyse the homoscedasticity of the square-root transformed data, residual plots were generated using the generic plot function in R (R Core Team 2018).

## References

Jeffares DC, Tomiczek B, Sojo V, dos Reis M. 2015. A Beginners Guide to Estimating the Non-synonymous to Synonymous Rate Ratio of all Protein-Coding Genes in a Genome. In: Peacock C, editor. *Parasite Genomics Protocols*. New York, NY: Springer New York. p. 65–90.

R Core Team. 2018. *R: A Language and Environment for Statistical Computing*.

Yang Z. 1997. PAML: a program package for phylogenetic analysis by maximum likelihood. *Comput Appl Biosci*. 13(5):555–6. doi:10.1093/bioinformatics/13.5.555.
